# Supplementary material for: Circulating biomarkers of cardiovascular disease are related to aneurysm volume in abdominal aortic aneurysm
Source: PubMed Central journal article supplement (PMC10559648; doi:10.1177/1358863x231181159), 2023-07-03
Supplement: sj-pdf-1-vmj-10.1177_1358863X231181159.pdf [file sj-pdf-1-vmj-10.1177_1358863X231181159.pdf]

**Table S1. Cardiovascular related biomarkers included in the Cardiovascular III panel**

| Abbreviation  | Full biomarker name                                  | Abbreviation   | Full biomarker name                                       |
|---------------|------------------------------------------------------|----------------|-----------------------------------------------------------|
| ALCAM         | CD166 antigen                                        | LDLR           | Low-density lipoprotein receptor                          |
| AP-N          | Aminopeptidase N                                     | LTBR           | Lymphotoxin-beta receptor                                 |
| AXL           | Tyrosine-protein kinase receptor UFO                 | MB             | Myoglobin                                                 |
| AZU1          | Azurocidin                                           | MCP-1          | Monocyte chemotactic protein 1                            |
| BLM hydrolase | Bleomycin hydrolase                                  | MEPE           | Matrix extracellular phosphoglycoprotein                  |
| CASP-3        | Caspase-3                                            | MMP-2          | Matrix metalloproteinase-2                                |
| CCL15         | C-C motif chemokine 15                               | MMP-3          | Matrix metalloproteinase-3                                |
| CCL16         | C-C motif chemokine 16                               | MMP-9          | Matrix metalloproteinase-9                                |
| CCL24         | C-C motif chemokine 24                               | MPO            | Myeloperoxidase                                           |
| CD163         | Scavenger receptor cysteine-rich type 1 protein M130 | Notch 3        | Neurogenic locus notch homolog protein 3                  |
| CD93          | Complement component C1q receptor                    | NT-proBNP      | N-terminal prohormone brain natriuretic peptide           |
| CDH5          | Cadherin-5                                           | OPG            | Osteoprotegerin                                           |
| CHI3L1        | Chitinase-3-like protein 1                           | OPN            | Osteopontin                                               |
| CHIT1         | Chitotriosidase-1                                    | PAI            | Plasminogen activator inhibitor 1                         |
| CNTN1         | Contactin-1                                          | PCSK9          | Proprotein convertase subtilisin/kexin type 9             |
| COL1A1        | Collagen alpha-1(I) chain                            | PDGF subunit A | Platelet-derived growth factor subunit A                  |
| CPA1          | Carboxypeptidase A1                                  | PECAM-1        | Platelet endothelial cell adhesion molecule               |
| CPB1          | Carboxypeptidase B                                   | PGLYRP1        | Peptidoglycan recognition protein 1                       |
| CSTB          | Cystatin-B                                           | PI3            | Elafin                                                    |
| CTSD          | Cathepsin D                                          | PLC            | Perlecan                                                  |
| CTSZ          | Cathepsin Z                                          | PON3           | Paraoxonase 3                                             |
| CXCL16        | C-X-C motif chemokine 16                             | PRTN3          | Myeloblastin                                              |
| DLK-1         | Protein delta homolog 1                              | PSP-D          | Pulmonary surfactant-associated protein D                 |
| EGFR          | Epidermal growth factor receptor                     | RARRES2        | Retinoic acid receptor responder protein 2                |
| Ep-CAM        | Epithelial cell adhesion molecule                    | RETN           | Resistin                                                  |
| EPHB4         | Ephrin type-B receptor 4                             | SCGB3A2        | Secretoglobin family 3A member 2                          |
| FABP4         | Fatty acid-binding protein, adipocyte                | SELE           | E-selectin                                                |
| FAS           | Tumor necrosis factor receptor superfamily member 6  | SELP           | P-selectin                                                |
| Gal-3         | Galectin-3                                           | SHPS-1         | Tyrosine-protein phosphatase nonreceptor type substrate 1 |
| Gal-4         | Galectin-4                                           | ST2            | ST2 protein                                               |
| GDF15         | Growth/differentiation factor 15                     | TFF3           | Trefoil factor 3                                          |
| GP6           | Platelet glycoprotein VI                             | TFPI           | Tissue factor pathway inhibitor                           |
| GRN           | Granulins                                            | TIMP4          | Metalloproteinase inhibitor 4                             |
| ICAM-2        | Intercellular adhesion molecule 2                    | TLT-2          | Trem-like transcript 2 protein                            |
| IGFBP-1       | Insulin-like growth factor-binding protein 1         | TNF-R1         | Tumor necrosis factor receptor 1                          |
| IGFBP-2       | Insulin-like Growth Factor-Binding Protein 2         | TNF-R2         | Tumor necrosis factor receptor 2                          |
| IGFBP-7       | Insulin-like growth factor-binding protein 7         | TNFRSF10C      | Tumor necrosis factor receptor superfamily member 10C     |
| IL-17RA       | Interleukin-17 receptor A                            | TNFRSF14       | Tumor necrosis factor receptor superfamily member 14      |
| IL-18BP       | Interleukin-18-binding protein                       | TNFSF13B       | Tumor necrosis factor ligand superfamily member 13B       |
| IL-1RT1       | Interleukin-1 receptor type 1                        | t-PA           | Tissue-type plasminogen activator                         |
| IL-1RT2       | Interleukin-1 receptor type 2                        | TR             | Transferrin receptor protein 1                            |
| IL-2RA        | Interleukin-2 receptor subunit alpha                 | TR-AP          | Tartrate-resistant acid phosphatase type 5                |
| IL-6RA        | Interleukin-6 receptor subunit alpha                 | uPA            | Urokinase-type plasminogen activator                      |
| ITGB2         | Integrin beta-2                                      | U-PAR          | Urokinase plasminogen activator surface receptor          |
| JAM-A         | Junctional adhesion molecule A                       | vWF            | von Willebrand factor                                     |
| KLK6          | Kallikrein-6                                         |                |                                                           |

**Table S2. Biomarker concentrations (in NPX value) in watchful waiting patients according to clusters**

|               | Watchful waiting<br>n=110 | Cluster 1<br>n=62        | Cluster 2<br>n=48        | Adj p-value |
|---------------|---------------------------|--------------------------|--------------------------|-------------|
| ALCAM         | 6.365 (6.219 - 6.583)     | 6.251 (6.149 - 6.367)    | 6.596 (6.442 - 6.695)    | <.001       |
| AP-N          | 4.872 (4.714 - 5.064)     | 4.870 (4.701 - 5.031)    | 4.929 (4.768 - 5.081)    | .35         |
| AXL           | 7.546 (7.311 - 7.746)     | 7.400 (7.187 - 7.567)    | 7.692 (7.541 - 7.928)    | <.001       |
| AZU1          | 2.349 (2.098 - 2.565)     | 2.225 (1.978 - 2.454)    | 2.460 (2.274 - 2.632)    | <.001       |
| BLM hydrolase | 2.834 (2.608 - 3.183)     | 2.777 (2.568 - 3.047)    | 3.038 (2.754 - 3.316)    | .013        |
| CASP-3*       | 8.260 (7.424 - 8.926)     | 8.192 (7.285 - 8.788)    | 8.391 (7.654 - 9.039)    | .22         |
| CCL15         | 6.960 (6.669 - 7.236)     | 6.724 (6.546 - 6.925)    | 7.160 (7.056 - 7.483)    | <.001       |
| CCL16         | 6.075 (5.708 - 6.404)     | 5.927 (5.512 - 6.143)    | 6.394 (6.003 - 6.599)    | <.001       |
| CCL24         | 5.170 (4.530 - 5.783)     | 5.321 (4.493 - 5.869)    | 5.091 (4.584 - 5.648)    | .68         |
| CD163         | 7.059 (6.839 - 7.363)     | 6.957 (6.763 - 7.162)    | 7.236 (7.026 - 7.525)    | <.001       |
| CD93          | 10.311 (9.997 - 10.504)   | 10.118 (9.914 - 10.316)  | 10.494 (10.344 - 10.660) | <.001       |
| CDH5          | 2.727 (2.557 - 2.923)     | 2.651 (2.491 - 2.764)    | 2.859 (2.717 - 3.069)    | <.001       |
| CHI3L1        | 6.079 (5.356 - 6.795)     | 5.689 (5.119 - 6.200)    | 6.735 (5.977 - 7.259)    | <.001       |
| CHIT1         | 4.334 (3.610 - 4.922)     | 4.104 (3.326 - 4.579)    | 4.814 (3.961 - 5.169)    | .003        |
| CNTN1         | 3.446 (3.222 - 3.592)     | 3.360 (3.123 - 3.563)    | 3.530 (3.293 - 3.651)    | .012        |
| COL1A1        | 1.714 (1.497 - 1.908)     | 1.641 (1.427 - 1.844)    | 1.795 (1.593 - 2.031)    | .01         |
| CPA1          | 4.634 (4.152 - 5.150)     | 4.516 (4.008 - 5.051)    | 4.851 (4.324 - 5.239)    | .16         |
| CPB1*         | 5.219 (4.786 - 5.746)     | 5.147 (4.623 - 5.634)    | 5.396 (4.884 - 5.883)    | .083        |
| CSTB          | 4.548 (4.158 - 4.990)     | 4.296 (4.008 - 4.506)    | 5.019 (4.729 - 5.288)    | <.001       |
| CTSD          | 2.954 (2.737 - 3.321)     | 2.807 (2.607 - 3.082)    | 3.151 (2.859 - 3.406)    | <.001       |
| CTSZ          | 4.016 (3.717 - 4.229)     | 3.765 (3.560 - 4.031)    | 4.221 (4.097 - 4.392)    | <.001       |
| CXCL16        | 5.212 (4.995 - 5.448)     | 5.099 (4.929 - 5.257)    | 5.410 (5.210 - 5.592)    | <.001       |
| DLK-1         | 5.270 (4.740 - 5.772)     | 5.027 (4.513 - 5.439)    | 5.496 (5.258 - 5.942)    | <.001       |
| EGFR          | 1.654 (1.549 - 1.751)     | 1.642 (1.554 - 1.730)    | 1.680 (1.547 - 1.764)    | .36         |
| Ep-CAM        | 4.527 (4.212 - 5.317)     | 4.521 (4.125 - 5.260)    | 4.532 (4.273 - 5.351)    | .40         |
| EPHB4*        | 4.690 (4.513 - 4.929)     | 4.546 (4.386 - 4.683)    | 4.996 (4.830 - 5.154)    | <.001       |
| FABP4         | 4.428 (4.008 - 5.091)     | 4.129 (3.686 - 4.478)    | 5.039 (4.492 - 5.540)    | <.001       |
| FAS           | 4.866 (4.642 - 5.071)     | 4.710 (4.567 - 4.854)    | 5.120 (4.922 - 5.335)    | <.001       |
| Gal-3         | 4.164 (3.924 - 4.372)     | 4.030 (3.878 - 4.199)    | 4.369 (4.178 - 4.500)    | <.001       |
| Gal-4         | 3.692 (3.327 - 3.977)     | 3.525 (3.187 - 3.771)    | 3.899 (3.664 - 4.049)    | <.001       |
| GDF15         | 5.218 (4.760 - 5.628)     | 4.813 (4.513 - 5.185)    | 5.509 (5.297 - 5.905)    | <.001       |
| GP6*          | 2.882 (2.307 - 3.234)     | 2.759 (2.159 - 3.225)    | 2.972 (2.431 - 3.250)    | .16         |
| GRN           | 4.345 (4.167 - 4.501)     | 4.237 (4.044 - 4.377)    | 4.482 (4.334 - 4.607)    | <.001       |
| ICAM-2        | 4.553 (4.361 - 4.740)     | 4.491 (4.241 - 4.623)    | 4.630 (4.415 - 4.932)    | .001        |
| IGFBP-1       | 4.596 (3.617 - 5.453)     | 4.458 (3.252 - 5.020)    | 5.072 (4.302 - 5.764)    | .001        |
| IGFBP-2       | 7.925 (7.430 - 8.491)     | 7.662 (7.230 - 8.183)    | 8.227 (7.693 - 8.925)    | .001        |
| IGFBP-7       | 7.907 (7.678 - 8.195)     | 7.731 (7.502 - 7.897)    | 8.193 (7.985 - 8.290)    | <.001       |
| IL-17RA       | 3.202 (2.919 - 3.464)     | 3.049 (2.854 - 3.309)    | 3.433 (3.168 - 3.746)    | <.001       |
| IL-18BP*      | 5.621 (5.363 - 5.908)     | 5.436 (5.266 - 5.600)    | 5.961 (5.757 - 6.121)    | <.001       |
| IL-1RT1       | 4.869 (4.672 - 5.039)     | 4.721 (4.579 - 4.883)    | 5.051 (4.879 - 5.229)    | <.001       |
| IL-1RT2       | 4.920 (4.705 - 5.103)     | 4.895 (4.686 - 5.069)    | 4.982 (4.760 - 5.178)    | .15         |
| IL-2RA        | 3.943 (3.665 - 4.235)     | 3.802 (3.368 - 3.996)    | 4.127 (3.864 - 4.483)    | <.001       |
| IL-6RA        | 11.416 (11.114 - 11.621)  | 11.326 (10.968 - 11.486) | 11.557 (11.261 - 11.831) | <.001       |
| ITGB2         | 4.565 (4.320 - 4.825)     | 4.463 (4.252 - 4.703)    | 4.735 (4.546 - 4.896)    | <.001       |
| JAM-A*        | 6.299 (5.767 - 7.028)     | 6.199 (5.582 - 6.715)    | 6.598 (5.888 - 7.078)    | .037        |
| KLK6          | 3.538 (3.270 - 3.811)     | 3.395 (3.196 - 3.571)    | 3.779 (3.535 - 4.154)    | <.001       |
| LDLR          | 3.908 (3.624 - 4.246)     | 3.864 (3.618 - 4.214)    | 4.046 (3.694 - 4.313)    | .16         |
| LTBR*         | 3.126 (2.908 - 3.387)     | 2.927 (2.756 - 3.102)    | 3.403 (3.261 - 3.690)    | <.001       |

|                |                          |                          |                          |       |
|----------------|--------------------------|--------------------------|--------------------------|-------|
| MB             | 6.275 (5.849 - 6.702)    | 6.098 (5.696 - 6.512)    | 6.463 (6.161 - 6.927)    | .004  |
| MCP-1          | 4.059 (3.799 - 4.203)    | 3.910 (3.773 - 4.082)    | 4.147 (4.057 - 4.320)    | <.001 |
| MEPE           | 3.782 (3.517 - 4.131)    | 3.644 (3.356 - 3.820)    | 4.138 (3.779 - 4.395)    | <.001 |
| MMP-2          | 2.264 (2.113 - 2.547)    | 2.203 (2.046 - 2.361)    | 2.404 (2.246 - 2.641)    | <.001 |
| MMP-3          | 5.785 (5.337 - 6.266)    | 5.688 (5.172 - 5.921)    | 6.167 (5.669 - 6.524)    | <.001 |
| MMP-9          | 4.177 (3.487 - 4.391)    | 4.020 (3.414 - 4.377)    | 4.261 (3.587 - 4.397)    | .35   |
| MPO            | 2.199 (1.967 - 2.461)    | 2.074 (1.832 - 2.284)    | 2.345 (2.213 - 2.588)    | <.001 |
| Notch 3        | 4.353 (4.087 - 4.569)    | 4.205 (3.966 - 4.409)    | 4.522 (4.318 - 4.849)    | <.001 |
| NT-proBNP      | 3.510 (2.691 - 4.418)    | 3.089 (2.517 - 3.787)    | 3.846 (3.253 - 4.961)    | .002  |
| OPG            | 3.060 (2.870 - 3.350)    | 2.963 (2.711 - 3.119)    | 3.291 (2.996 - 3.524)    | <.001 |
| OPN            | 7.263 (6.886 - 7.622)    | 6.937 (6.727 - 7.268)    | 7.564 (7.362 - 7.888)    | <.001 |
| PAI*           | 5.625 (5.150 - 5.974)    | 5.593 (5.150 - 5.886)    | 5.689 (5.152 - 6.175)    | .34   |
| PCSK9          | 2.183 (2.027 - 2.411)    | 2.149 (1.933 - 2.328)    | 2.317 (2.157 - 2.508)    | <.001 |
| PDGF subunit A | 2.660 (2.044 - 3.099)    | 2.631 (2.044 - 3.050)    | 2.669 (2.069 - 3.132)    | .34   |
| PECAM-1*       | 4.613 (4.157 - 5.144)    | 4.511 (4.078 - 5.020)    | 4.858 (4.406 - 5.294)    | .023  |
| PGLYRP1        | 7.185 (6.948 - 7.413)    | 7.018 (6.810 - 7.230)    | 7.363 (7.171 - 7.679)    | <.001 |
| PI3            | 2.268 (1.973 - 2.859)    | 2.049 (1.775 - 2.298)    | 2.831 (2.318 - 3.233)    | <.001 |
| PLC*           | 7.442 (7.147 - 7.694)    | 7.186 (7.002 - 7.372)    | 7.721 (7.574 - 7.912)    | <.001 |
| PON3           | 4.578 (4.142 - 4.927)    | 4.622 (4.170 - 4.892)    | 4.556 (4.029 - 4.938)    | .60   |
| PRTN3          | 3.701 (3.365 - 3.954)    | 3.561 (3.225 - 3.799)    | 3.805 (3.664 - 4.004)    | <.001 |
| PSP-D          | 2.537 (2.129 - 3.006)    | 2.403 (2.076 - 2.823)    | 2.679 (2.290 - 3.140)    | .073  |
| RARRES2        | 10.909 (10.676 - 11.048) | 10.730 (10.547 - 10.917) | 11.032 (10.919 - 11.182) | <.001 |
| RETN           | 6.341 (5.916 - 6.615)    | 5.975 (5.763 - 6.405)    | 6.553 (6.299 - 6.974)    | <.001 |
| SCGB3A2        | 2.176 (1.708 - 2.697)    | 1.985 (1.454 - 2.523)    | 2.473 (2.046 - 2.932)    | <.001 |
| SELE           | 9.602 (9.183 - 9.941)    | 9.464 (9.090 - 9.817)    | 9.715 (9.427 - 10.042)   | .034  |
| SELP*          | 9.658 (9.081 - 10.149)   | 9.503 (9.052 - 10.043)   | 9.917 (9.330 - 10.233)   | .029  |
| SHPS-1         | 3.139 (2.903 - 3.397)    | 3.012 (2.803 - 3.157)    | 3.371 (3.142 - 3.658)    | <.001 |
| ST2            | 6.015 (5.711 - 6.301)    | 5.911 (5.624 - 6.205)    | 6.114 (5.840 - 6.407)    | .011  |
| TFF3           | 5.947 (5.496 - 6.281)    | 5.624 (5.362 - 5.907)    | 6.287 (6.129 - 6.688)    | <.001 |
| TFPI           | 8.423 (8.257 - 8.690)    | 8.339 (8.126 - 8.521)    | 8.603 (8.374 - 8.732)    | .001  |
| TIMP4          | 4.109 (3.727 - 4.506)    | 3.946 (3.675 - 4.153)    | 4.452 (4.137 - 4.782)    | <.001 |
| TLT-2          | 4.431 (4.193 - 4.704)    | 4.333 (4.106 - 4.465)    | 4.614 (4.422 - 4.872)    | <.001 |
| TNF-R1*        | 5.874 (5.559 - 6.197)    | 5.599 (5.427 - 5.742)    | 6.240 (6.097 - 6.633)    | <.001 |
| TNF-R2*        | 4.621 (4.344 - 5.000)    | 4.382 (4.181 - 4.548)    | 5.107 (4.772 - 5.325)    | <.001 |
| TNFRSF10C      | 3.907 (3.543 - 4.195)    | 3.774 (3.405 - 3.975)    | 4.141 (3.749 - 4.323)    | <.001 |
| TNFRSF14       | 4.333 (4.081 - 4.735)    | 4.122 (3.969 - 4.267)    | 4.773 (4.524 - 4.963)    | <.001 |
| TNFSF13B       | 6.330 (6.107 - 6.581)    | 6.263 (6.057 - 6.402)    | 6.439 (6.295 - 6.737)    | .001  |
| t-PA           | 4.849 (4.423 - 5.186)    | 4.612 (4.265 - 4.944)    | 5.139 (4.846 - 5.426)    | <.001 |
| TR             | 4.256 (3.853 - 4.716)    | 4.152 (3.763 - 4.379)    | 4.395 (3.911 - 4.858)    | .032  |
| TR-AP          | 4.027 (3.796 - 4.289)    | 3.953 (3.797 - 4.114)    | 4.135 (3.804 - 4.455)    | .023  |
| uPA            | 4.700 (4.505 - 4.813)    | 4.575 (4.450 - 4.740)    | 4.791 (4.697 - 4.924)    | <.001 |
| U-PAR          | 4.628 (4.360 - 4.952)    | 4.393 (4.242 - 4.588)    | 4.955 (4.812 - 5.119)    | <.001 |
| vWF            | 5.661 (5.150 - 6.174)    | 5.419 (4.881 - 5.703)    | 6.180 (5.675 - 6.711)    | <.001 |

Biomarkers are expressed in Normalized Protein eXpression (NPX), which are relative units that result from the polymerase chain reaction and which are on the log2 scale. A high NPX value equals a high biomarker concentration and, because of the log2 scale, one unit difference in NPX represents a doubling of the protein concentration. All biomarkers are expressed as median (25<sup>th</sup> - 75th percentile).

\* For highly correlated biomarker pairs (Pearson's correlation coefficient >0.8), the biomarker with the highest mean correlation was excluded. Accordingly, 13 biomarkers were excluded from the cluster analysis in the watchful waiting group: CASP-3, CPB1, EPHB4, GP6, IL18BP, JAM-A, LTBR, PAI, PECAM-1, PLC, SELP, TNF-R1, TNF-R2.

**Table S3. Biomarker concentrations (in NPX value) in EVAR patients according to clusters**

|               | EVAR<br>n=203            | Cluster 1<br>n=136       | Cluster 2<br>n=67        | Adj p-value |
|---------------|--------------------------|--------------------------|--------------------------|-------------|
| ALCAM         | 6.416 (6.249 - 6.574)    | 6.335 (6.199 - 6.450)    | 6.607 (6.513 - 6.797)    | <.001       |
| AP-N          | 4.870 (4.713 - 5.076)    | 4.870 (4.703 - 5.035)    | 4.870 (4.750 - 5.140)    | .18         |
| AXL           | 7.585 (7.422 - 7.779)    | 7.494 (7.366 - 7.644)    | 7.824 (7.639 - 7.954)    | <.001       |
| AZU1          | 2.525 (2.227 - 2.886)    | 2.442 (2.169 - 2.733)    | 2.701 (2.477 - 3.013)    | <.001       |
| BLM hydrolase | 3.152 (2.904 - 3.358)    | 3.149 (2.905 - 3.336)    | 3.152 (2.914 - 3.403)    | .31         |
| CASP-3*       | 8.779 (8.265 - 9.232)    | 8.786 (8.292 - 9.174)    | 8.661 (8.176 - 9.327)    | .68         |
| CCL15         | 7.083 (6.768 - 7.501)    | 6.905 (6.626 - 7.208)    | 7.540 (7.201 - 7.874)    | <.001       |
| CCL16         | 6.080 (5.786 - 6.420)    | 5.943 (5.493 - 6.210)    | 6.468 (6.142 - 6.772)    | <.001       |
| CCL24         | 5.075 (4.586 - 5.725)    | 5.031 (4.510 - 5.609)    | 5.144 (4.742 - 5.932)    | .095        |
| CD163         | 7.140 (6.829 - 7.394)    | 7.061 (6.786 - 7.348)    | 7.292 (7.036 - 7.513)    | .001        |
| CD93          | 10.271 (10.107 - 10.592) | 10.175 (10.020 - 10.281) | 10.724 (10.587 - 10.878) | <.001       |
| CDH5          | 2.739 (2.542 - 2.937)    | 2.673 (2.487 - 2.832)    | 2.936 (2.854 - 3.154)    | <.001       |
| CHI3L1        | 6.241 (5.794 - 6.973)    | 6.058 (5.712 - 6.565)    | 6.860 (6.207 - 7.375)    | <.001       |
| CHIT1         | 4.391 (3.742 - 5.193)    | 4.321 (3.702 - 4.929)    | 4.736 (3.966 - 5.525)    | .020        |
| CNTN1         | 3.424 (3.249 - 3.607)    | 3.374 (3.198 - 3.563)    | 3.465 (3.359 - 3.759)    | .001        |
| COL1A1        | 1.758 (1.563 - 1.998)    | 1.685 (1.437 - 1.860)    | 1.965 (1.654 - 2.301)    | <.001       |
| CPA1          | 4.693 (4.259 - 5.231)    | 4.537 (4.126 - 5.070)    | 5.008 (4.652 - 5.562)    | <.001       |
| CPB1*         | 5.351 (4.902 - 5.891)    | 5.250 (4.779 - 5.649)    | 5.793 (5.242 - 6.161)    | <.001       |
| CSTB          | 4.900 (4.527 - 5.346)    | 4.697 (4.397 - 5.021)    | 5.431 (5.067 - 5.820)    | <.001       |
| CTSD          | 2.983 (2.776 - 3.280)    | 2.968 (2.727 - 3.208)    | 3.068 (2.884 - 3.388)    | .014        |
| CTSZ          | 3.998 (3.757 - 4.256)    | 3.842 (3.709 - 4.024)    | 4.324 (4.097 - 4.506)    | <.001       |
| CXCL16        | 5.201 (4.980 - 5.421)    | 5.088 (4.934 - 5.239)    | 5.487 (5.349 - 5.720)    | <.001       |
| DLK-1         | 5.261 (4.888 - 5.727)    | 5.078 (4.691 - 5.350)    | 5.758 (5.403 - 6.320)    | <.001       |
| EGFR          | 1.646 (1.555 - 1.723)    | 1.641 (1.544 - 1.718)    | 1.648 (1.574 - 1.745)    | .22         |
| Ep-CAM        | 4.542 (3.991 - 5.209)    | 4.545 (3.903 - 5.181)    | 4.533 (4.118 - 5.242)    | .31         |
| EPHB4*        | 4.705 (4.545 - 5.050)    | 4.599 (4.472 - 4.711)    | 5.230 (5.050 - 5.589)    | <.001       |
| FABP4         | 4.528 (4.044 - 5.172)    | 4.284 (3.844 - 4.683)    | 5.195 (4.667 - 5.899)    | <.001       |
| FAS           | 4.935 (4.703 - 5.163)    | 4.784 (4.620 - 4.988)    | 5.275 (5.103 - 5.506)    | <.001       |
| Gal-3         | 4.217 (4.015 - 4.470)    | 4.140 (3.924 - 4.321)    | 4.485 (4.216 - 4.657)    | <.001       |
| Gal-4         | 3.676 (3.373 - 4.033)    | 3.508 (3.249 - 3.892)    | 4.000 (3.697 - 4.156)    | <.001       |
| GDF15         | 5.248 (4.874 - 5.767)    | 4.982 (4.691 - 5.295)    | 5.813 (5.534 - 6.308)    | <.001       |
| GP6*          | 3.215 (2.870 - 3.630)    | 3.189 (2.800 - 3.547)    | 3.294 (2.921 - 3.759)    | .14         |
| GRN           | 4.377 (4.204 - 4.554)    | 4.292 (4.116 - 4.416)    | 4.572 (4.421 - 4.711)    | <.001       |
| ICAM-2        | 4.637 (4.405 - 4.892)    | 4.553 (4.378 - 4.787)    | 4.879 (4.609 - 5.058)    | <.001       |
| IGFBP-1       | 4.550 (3.794 - 5.480)    | 4.327 (3.530 - 5.197)    | 5.086 (4.508 - 6.143)    | <.001       |
| IGFBP-2       | 8.367 (7.716 - 8.932)    | 8.056 (7.494 - 8.526)    | 8.961 (8.427 - 9.383)    | <.001       |
| IGFBP-7       | 7.906 (7.690 - 8.143)    | 7.763 (7.638 - 7.908)    | 8.244 (8.102 - 8.535)    | <.001       |
| IL-17RA       | 3.341 (3.068 - 3.525)    | 3.297 (2.998 - 3.466)    | 3.398 (3.264 - 3.694)    | .001        |
| IL-18BP       | 5.633 (5.402 - 5.986)    | 5.515 (5.309 - 5.678)    | 6.049 (5.866 - 6.373)    | <.001       |
| IL-1RT1       | 4.891 (4.684 - 5.114)    | 4.783 (4.648 - 4.939)    | 5.178 (5.007 - 5.338)    | <.001       |
| IL-1RT2       | 4.822 (4.596 - 5.022)    | 4.840 (4.621 - 5.027)    | 4.795 (4.584 - 5.016)    | .54         |
| IL-2RA        | 3.987 (3.650 - 4.317)    | 3.785 (3.560 - 4.117)    | 4.448 (4.109 - 4.793)    | <.001       |
| IL-6RA        | 11.366 (11.025 - 11.616) | 11.255 (10.957 - 11.515) | 11.551 (11.253 - 11.842) | <.001       |
| ITGB2         | 4.651 (4.455 - 4.847)    | 4.615 (4.398 - 4.769)    | 4.753 (4.560 - 4.948)    | <.001       |
| JAM-A*        | 6.788 (6.339 - 7.242)    | 6.784 (6.382 - 7.188)    | 6.802 (6.277 - 7.373)    | .45         |
| KLK6          | 3.605 (3.354 - 3.886)    | 3.479 (3.285 - 3.686)    | 3.967 (3.709 - 4.207)    | <.001       |
| LDLR          | 3.893 (3.581 - 4.229)    | 3.872 (3.558 - 4.192)    | 3.969 (3.611 - 4.274)    | .21         |
| LTBR*         | 3.185 (2.967 - 3.524)    | 3.042 (2.877 - 3.194)    | 3.707 (3.512 - 4.075)    | <.001       |
| MB            | 6.300 (5.858 - 6.769)    | 6.178 (5.738 - 6.470)    | 6.788 (6.352 - 7.339)    | <.001       |
| MCP-1         | 4.068 (3.914 - 4.297)    | 4.023 (3.808 - 4.167)    | 4.266 (4.121 - 4.440)    | <.001       |

|                |                          |                          |                          |       |
|----------------|--------------------------|--------------------------|--------------------------|-------|
| MEPE           | 3.802 (3.492 - 4.131)    | 3.642 (3.379 - 3.902)    | 4.249 (3.880 - 4.492)    | <.001 |
| MMP-2          | 2.416 (2.168 - 2.653)    | 2.360 (2.119 - 2.575)    | 2.581 (2.276 - 2.852)    | <.001 |
| MMP-3          | 5.904 (5.562 - 6.359)    | 5.807 (5.436 - 6.100)    | 6.365 (5.825 - 6.666)    | <.001 |
| MMP-9          | 4.281 (3.715 - 4.816)    | 4.207 (3.635 - 4.803)    | 4.364 (3.773 - 4.850)    | .54   |
| MPO            | 2.304 (2.094 - 2.532)    | 2.255 (2.042 - 2.457)    | 2.422 (2.178 - 2.677)    | <.001 |
| Notch3         | 4.437 (4.248 - 4.711)    | 4.354 (4.146 - 4.557)    | 4.726 (4.426 - 4.947)    | <.001 |
| NT-proBNP      | 4.023 (3.089 - 5.030)    | 3.654 (2.933 - 4.504)    | 4.838 (3.977 - 5.931)    | <.001 |
| OPG            | 3.134 (2.955 - 3.407)    | 3.050 (2.881 - 3.212)    | 3.418 (3.203 - 3.561)    | <.001 |
| OPN            | 7.585 (7.244 - 7.941)    | 7.387 (7.085 - 7.663)    | 8.086 (7.742 - 8.594)    | <.001 |
| PAI*           | 5.868 (5.347 - 6.235)    | 5.862 (5.390 - 6.236)    | 5.917 (5.281 - 6.224)    | .94   |
| PCSK9          | 2.270 (2.078 - 2.466)    | 2.241 (2.050 - 2.421)    | 2.310 (2.104 - 2.526)    | .052  |
| PDGF subunit A | 2.968 (2.624 - 3.414)    | 2.990 (2.704 - 3.383)    | 2.912 (2.453 - 3.466)    | .52   |
| PECAM-1*       | 5.011 (4.656 - 5.403)    | 4.996 (4.680 - 5.367)    | 5.057 (4.614 - 5.476)    | .54   |
| PGLYRP1        | 7.289 (7.008 - 7.678)    | 7.164 (6.906 - 7.457)    | 7.686 (7.287 - 8.158)    | <.001 |
| PI3            | 2.436 (2.039 - 2.970)    | 2.226 (1.893 - 2.609)    | 2.966 (2.567 - 3.574)    | <.001 |
| PLC            | 7.454 (7.179 - 7.820)    | 7.309 (7.065 - 7.474)    | 7.944 (7.815 - 8.119)    | <.001 |
| PON3           | 4.563 (4.188 - 5.030)    | 4.481 (4.063 - 4.862)    | 4.827 (4.414 - 5.135)    | .004  |
| PRTN3          | 3.893 (3.566 - 4.233)    | 3.797 (3.434 - 4.106)    | 4.140 (3.820 - 4.572)    | <.001 |
| PSP-D          | 2.552 (2.165 - 3.068)    | 2.506 (2.098 - 2.985)    | 2.764 (2.370 - 3.373)    | .007  |
| RARRES2        | 10.964 (10.721 - 11.159) | 10.840 (10.678 - 11.044) | 11.162 (11.014 - 11.352) | <.001 |
| RETN           | 6.393 (6.106 - 6.819)    | 6.248 (6.018 - 6.467)    | 6.871 (6.619 - 7.373)    | <.001 |
| SCGB3A2        | 2.176 (1.699 - 2.735)    | 2.043 (1.563 - 2.637)    | 2.376 (2.012 - 2.916)    | .001  |
| SELE           | 9.606 (9.200 - 10.024)   | 9.581 (9.162 - 9.937)    | 9.736 (9.328 - 10.136)   | .041  |
| SELP*          | 10.124 (9.667 - 10.547)  | 10.108 (9.665 - 10.464)  | 10.144 (9.759 - 10.645)  | .35   |
| SHPS-1         | 3.205 (2.876 - 3.428)    | 3.087 (2.778 - 3.266)    | 3.472 (3.253 - 3.729)    | <.001 |
| ST2            | 6.106 (5.848 - 6.447)    | 6.044 (5.715 - 6.289)    | 6.253 (5.994 - 6.634)    | <.001 |
| TFF3           | 5.956 (5.690 - 6.408)    | 5.790 (5.530 - 6.014)    | 6.619 (6.284 - 6.954)    | <.001 |
| TFPI           | 8.553 (8.391 - 8.756)    | 8.502 (8.255 - 8.634)    | 8.730 (8.551 - 8.928)    | <.001 |
| TIMP4          | 4.298 (3.967 - 4.626)    | 4.210 (3.854 - 4.469)    | 4.556 (4.251 - 4.789)    | <.001 |
| TLT-2          | 4.546 (4.349 - 4.798)    | 4.495 (4.246 - 4.667)    | 4.817 (4.584 - 5.163)    | <.001 |
| TNF-R1*        | 5.936 (5.661 - 6.373)    | 5.753 (5.527 - 5.947)    | 6.591 (6.243 - 6.960)    | <.001 |
| TNF-R2*        | 4.636 (4.407 - 5.035)    | 4.513 (4.294 - 4.641)    | 5.290 (4.933 - 5.761)    | <.001 |
| TNFRSF10C      | 3.908 (3.646 - 4.234)    | 3.809 (3.553 - 4.097)    | 4.105 (3.833 - 4.537)    | <.001 |
| TNFRSF14       | 4.500 (4.288 - 4.829)    | 4.352 (4.173 - 4.518)    | 4.949 (4.753 - 5.293)    | <.001 |
| TNFRSF13B      | 6.412 (6.238 - 6.654)    | 6.361 (6.177 - 6.531)    | 6.603 (6.382 - 6.859)    | <.001 |
| t-PA           | 4.738 (4.324 - 5.230)    | 4.651 (4.264 - 5.123)    | 4.870 (4.399 - 5.385)    | .063  |
| TR             | 4.477 (4.087 - 4.929)    | 4.349 (4.011 - 4.686)    | 4.806 (4.462 - 5.359)    | <.001 |
| TR-AP          | 4.049 (3.819 - 4.312)    | 3.978 (3.784 - 4.222)    | 4.212 (3.986 - 4.439)    | <.001 |
| uPA            | 4.691 (4.529 - 4.903)    | 4.643 (4.488 - 4.810)    | 4.890 (4.658 - 5.017)    | <.001 |
| U-PAR          | 4.732 (4.521 - 5.015)    | 4.582 (4.389 - 4.753)    | 5.195 (4.955 - 5.445)    | <.001 |
| vWF            | 5.856 (5.336 - 6.391)    | 5.787 (5.229 - 6.308)    | 6.230 (5.560 - 6.564)    | .001  |

Biomarkers are expressed in Normalized Protein eXpression (NPX), which are relative units that result from the polymerase chain reaction and which are on the log2 scale. A high NPX value equals a high biomarker concentration and, because of the log2 scale, one unit difference in NPX represents a doubling of the protein concentration. All biomarkers are expressed as median (25<sup>th</sup>- 75<sup>th</sup> percentile).

\* For highly correlated biomarker pairs (Pearson's correlation coefficient >0.8), the biomarker with the highest mean correlation was excluded. Accordingly, 11 biomarkers were excluded from the cluster analysis in the EVAR group: CASP-3, CPB1, EPHB4, GP6, JAM-A, LTBR, PAI, PECAM-1, SELP, TNF-R1, TNF-R2.

**Table S4. Clinical characteristics of watchful waiting patients according to cluster membership**

|                                               | Cluster 1<br>n=62    | Cluster 2<br>n=48   | p-value |
|-----------------------------------------------|----------------------|---------------------|---------|
| Age                                           | 70.5 ± 6.4           | 73.4 ± 7.6          | .034    |
| Male                                          | 57 (91.9)            | 41 (85.4)           | .28     |
| BMI                                           | 27.7 ± 3.3           | 27.6 ± 4.5          | .81     |
| <b>Medical history</b>                        |                      |                     |         |
| Coronary heart disease*                       | 23 (37.1)            | 18 (37.5)           | .97     |
| Heart Failure                                 | 3 (4.8)              | 5 (10.4)            | .29     |
| Hypertension                                  | 40 (64.5)            | 38 (79.2)           | .093    |
| Cerebrovascular disease                       | 9 (14.5)             | 7 (14.6)            | .99     |
| Diabetes mellitus                             | 15 (24.2)            | 12 (25.0)           | .92     |
| Peripheral arterial occlusive disease         | 12 (19.4)            | 12 (25.0)           | .48     |
| Chronic obstructive pulmonary disease         | 8 (12.9)             | 12 (25.0)           | .10     |
| Smoking                                       |                      |                     | 1.00    |
| Never                                         | 2 (3.2)              | 1 (2.1)             |         |
| Current                                       | 20 (32.3)            | 15 (31.2)           |         |
| Former                                        | 40 (64.5)            | 32 (66.7)           |         |
| <b>Medication use</b>                         |                      |                     |         |
| Antiplatelet                                  | 45 (72.6)            | 31 (64.6)           | .37     |
| Non-vitamin K oral anticoagulant (NOAC)       | 4 (6.5)              | 2 (4.2)             | .69     |
| Coumarin                                      | 3 (4.8)              | 9 (18.8)            | .020    |
| Beta-blocker                                  | 31 (50.0)            | 19 (39.6)           | .28     |
| Angiotensin converting enzyme (ACE) inhibitor | 17 (27.4)            | 14 (29.2)           | .84     |
| Angiotensin II receptor antagonist            | 17 (27.4)            | 16 (33.3)           | .50     |
| Thiazide diuretic                             | 7 (11.3)             | 14 (29.2)           | .018    |
| Lipid-lowering drug                           | 47 (75.8)            | 38 (79.2)           | .68     |
| <b>Aneurysm related information</b>           |                      |                     |         |
| Anatomical classification AAA - infrarenal    | 59 (95.2)            | 45 (93.8)           | .75     |
| Maximal diameter AAA (mm)                     | 50.0 (47.0 - 53.0)   | 49.0 (46.0 - 52.3)  | .55     |
| AAA volume (mL)                               | 107.2 (94.2 - 128.7) | 99.8 (90.2 - 130.0) | .52     |
| Concurrent iliac artery aneurysm              | 12 (19.4)            | 6 (12.5)            | .34     |

Continuous variables with a normal distribution are presented as mean ± standard deviation (SD), or median (25<sup>th</sup> - 75<sup>th</sup> percentile) in case of non-normality. Differences in baseline characteristics between patients in the two clusters were tested with Student t-tests or Mann Whitney U tests depending on their distributions. Categorical variables are presented as counts and percentages and differences between groups were tested using the chi-square test or Fisher's exact test, as appropriate.

\*Coronary heart disease: history of myocardial infarction, and/or percutaneous coronary intervention and/or coronary artery bypass grafting.

AAA: abdominal aortic aneurysm.

**Table S5. Clinical characteristics of EVAR patients according to cluster membership**

|                                               | Cluster 1<br>n=136    | Cluster 2<br>n=67     | p-value |
|-----------------------------------------------|-----------------------|-----------------------|---------|
| Age                                           | 73.1 ±7.4             | 76.7 ±7.6             | .001    |
| Male                                          | 128 (94.1)            | 59 (88.1)             | .13     |
| BMI                                           | 26.8 ±3.8             | 26.8 ±3.7             | .99     |
| <b>Medical history</b>                        |                       |                       |         |
| Coronary heart disease*                       | 44 (32.4)             | 25 (37.3)             | .48     |
| Heart Failure                                 | 6 (4.4)               | 7 (10.4)              | .099    |
| Hypertension                                  | 104 (76.5)            | 58 (86.6)             | .092    |
| Cerebrovascular disease                       | 27 (19.9)             | 11 (16.4)             | .56     |
| Diabetes mellitus                             | 22 (16.2)             | 13 (19.4)             | .57     |
| Peripheral arterial occlusive disease         | 18 (13.2)             | 10 (14.9)             | .74     |
| Chronic obstructive pulmonary disease         | 33 (24.3)             | 15 (22.4)             | .77     |
| Smoking                                       |                       |                       | .57     |
| Never                                         | 8 (5.9)               | 2 (3.0)               |         |
| Current                                       | 33 (24.3)             | 20 (29.9)             |         |
| Former                                        | 95 (69.9)             | 45 (67.2)             |         |
| <b>Medication use</b>                         |                       |                       |         |
| Antiplatelet                                  | 108 (79.4)            | 50 (74.6)             | .44     |
| Non-vitamin K oral anticoagulant (NOAC)       | 8 (5.9)               | 1 (1.5)               | .28     |
| Coumarin                                      | 14 (10.3)             | 11 (16.4)             | .21     |
| Beta-blocker                                  | 68 (50.0)             | 48 (71.6)             | .003    |
| Angiotensin converting enzyme (ACE) inhibitor | 36 (26.5)             | 24 (35.8)             | .17     |
| Angiotensin II receptor antagonist            | 38 (27.9)             | 20 (29.9)             | .78     |
| Thiazide diuretic                             | 27 (19.9)             | 14 (20.9)             | .86     |
| Lipid-lowering drug                           | 113 (83.1)            | 54 (80.6)             | .66     |
| <b>Aneurysm related information</b>           |                       |                       |         |
| Anatomical classification AAA - infrarenal    | 123 (90.4)            | 58 (86.6)             | .40     |
| Maximal diameter AAA (mm)                     | 55.0 (45.8 - 63.7)    | 56.0 (45.0 - 67.0)    | .35     |
| Sac volume (mL)                               | 142.1 (103.1 - 197.5) | 157.7 (113.8 - 241.6) | .17     |
| Concurrent iliac artery aneurysm              | 40 (29.4)             | 16 (23.9)             | .41     |
| <b>Surgery related information</b>            |                       |                       |         |
| Type of index surgery                         |                       |                       | .82     |
| Primary EVAR                                  | 114 (83.8)            | 57 (85.1)             |         |
| Reintervention                                | 22 (16.2)             | 10 (14.9)             |         |
| AAA ruptured at admission                     | 9 (6.6)               | 5 (7.5)               | .82     |
| ASA classification                            |                       |                       | .58     |
| ASA I or II                                   | 57 (41.9)             | 24 (35.8)             |         |
| ASA III, IV or IV                             | 66 (48.5)             | 34 (5.7)              |         |
| Unknown                                       | 13 (9.6)              | 9 (13.4)              |         |

Continuous variables with a normal distribution are presented as mean ± standard deviation (SD), or median (25<sup>th</sup> - 75<sup>th</sup> percentile) in case of non-normality. Differences in baseline characteristics between patients in the two clusters were tested with Student t-tests or Mann Whitney U tests depending on their distributions. Categorical variables are presented as counts and percentages and differences between groups were tested using the chi-square test or Fisher's exact test, as appropriate.

\*Coronary heart disease: history of myocardial infarction, and/or percutaneous coronary intervention and/or coronary artery bypass grafting.

AAA: abdominal aortic aneurysm, ASA classification: Physical Status Classification System by the American Society of Anesthesiologists, EVAR: Endovascular Aneurysm Repair.

**Table S6. Sensitivity analysis on the association of biomarkers with aneurysm sac volume in EVAR patients - adjusted for confounders**

|        | A       |                  |                      | B       |                  |                      | C       |                  |                      | D       |                  |                 |
|--------|---------|------------------|----------------------|---------|------------------|----------------------|---------|------------------|----------------------|---------|------------------|-----------------|
|        | $\beta$ | 95% CI           | Adj. <i>p</i> -value | $\beta$ | 95% CI           | Adj. <i>p</i> -value | $\beta$ | 95% CI           | Adj. <i>p</i> -value | $\beta$ | 95% CI           | <i>p</i> -value |
| IGFBP2 | 0.168   | (0.078, 0.258)   | .001                 | 0.136   | (0.047, 0.226)   | .012                 | 0.162   | (0.068, 0.255)   | .003                 | 0.050   | (-0.062, 0.163)  | .376            |
| LDLR   | -0.151  | (-0.237, -0.064) | .001                 | -0.116  | (-0.203, -0.029) | .013                 | -0.117  | (-0.205, -0.028) | .011                 | -0.149  | (-0.242, -0.057) | .002            |
| TFPI   | 0.149   | (0.062, 0.237)   | .001                 | 0.122   | (0.036, 0.208)   | .012                 | 0.136   | (0.041, 0.232)   | .011                 | 0.146   | (0.034, 0.257)   | .011            |
| TIMP4  | 0.140   | (0.045, 0.235)   | .004                 | 0.110   | (0.017, 0.203)   | .021                 | 0.126   | (0.030, 0.222)   | .011                 | 0.057   | (-0.045, 0.159)  | .270            |

The statistical analyses were repeated while excluding patients who initially underwent EVAR for ruptured AAA and patients with a re-intervention between the EVAR and current measurements.

Linear regression analysis was applied to examine associations of individual biomarkers with sac volume.

A) Biomarkers with an adjusted *p*-value <.05 in univariable linear regression were adjusted for age, sex and body surface area.

B) Additionally, time between EVAR surgery and study visit was also added to the model.

C) Next, additional pre-defined variables were added: history of coronary heart disease, hypertension, diabetes mellitus, smoking status, peripheral arterial occlusive disease, antiplatelet therapy, lipid lowering drug therapy and familial abdominal aortic aneurysm.

D) Lastly, the four biomarkers of interest, together with the covariates from model C, were used to construct an adjusted multimarker model.

Results are presented as the mean effect with 95% confidence interval (CI) of a 1 standard deviation (SD) difference of the biomarker on sac volume (expressed as log<sub>e</sub> mL) . We corrected for multiple testing concluding significance with a Benjamini-Hochberg adjusted *p*-value <.05.

Abbreviations used: adj. *p*-value: adjusted *p*-value,  $\beta$ : regression coefficient, CI: confidence interval.

**Table S7. Analysis on the association of biomarkers with aneurysm sac growth in EVAR patients - adjusted for confounders**

|        | A       |                  |                 | B       |                  |                 | C       |                  |                 |
|--------|---------|------------------|-----------------|---------|------------------|-----------------|---------|------------------|-----------------|
|        | $\beta$ | 95% CI           | <i>p</i> -value | $\beta$ | 95% CI           | <i>p</i> -value | $\beta$ | 95% CI           | <i>p</i> -value |
| LDLR   | -3.235  | (-5.150, -1.319) | .001            | -2.346  | (-4.268, -0.423) | .017            | -2.527  | (-4.486, -0.569) | .012            |
| IGFBP2 | 1.152   | (-0.93, 3.234)   | .277            | 0.111   | (-1.952, 2.173)  | .916            | 0.404   | (-1.731, 2.540)  | .709            |
| TFPI   | 1.562   | (-0.435, 3.558)  | .125            | 0.915   | (-1.030, 2.861)  | .355            | 1.521   | (-0.598, 3.639)  | .158            |
| TIMP4  | 1.376   | (-0.645, 3.397)  | .181            | 0.723   | (-1.245, 2.691)  | .469            | 0.721   | (-1.313, 2.755)  | .485            |

The statistical analyses were repeated using sac growth defined as absolute difference between current diameter and preoperative diameter.

Linear regression analysis was applied to examine associations of individual biomarkers with sac growth.

A) Biomarkers with an adjusted *p*-value <.05 in univariable linear regression were adjusted for age, sex and body surface area. Additionally, the biomarkers of interest from the sac volume model in the EVAR group are also shown, to allow comparison between the sac volume and sac growth results.

B) Additionally, time between EVAR surgery and study visit was also added to the model.

C) Next, additional pre-defined variables were added: history of coronary heart disease, hypertension, diabetes mellitus, smoking status, peripheral arterial occlusive disease, antiplatelet therapy, lipid lowering drug therapy and familial abdominal aortic aneurysm.

Results are presented as the mean effect with 95% confidence interval (CI) of a 1 standard deviation (SD) difference of the biomarker on sac growth (expressed as mm).

As only one marker was selected by univariate linear regression and the other markers are merely illustratively portrayed, we did not correct the *p*-values for multiple testing.



---

Abbreviations used:  $\beta$ : regression coefficient, CI: confidence interval.

---
