# Supplementary material for: Circulating biomarkers of cardiovascular disease are related to aneurysm volume in abdominal aortic aneurysm
Source: PubMed Central journal article supplement (PMC10559648; doi:10.1177/1358863x231181159), 2023-07-03

## Supplemental Figure S1. Flowchart

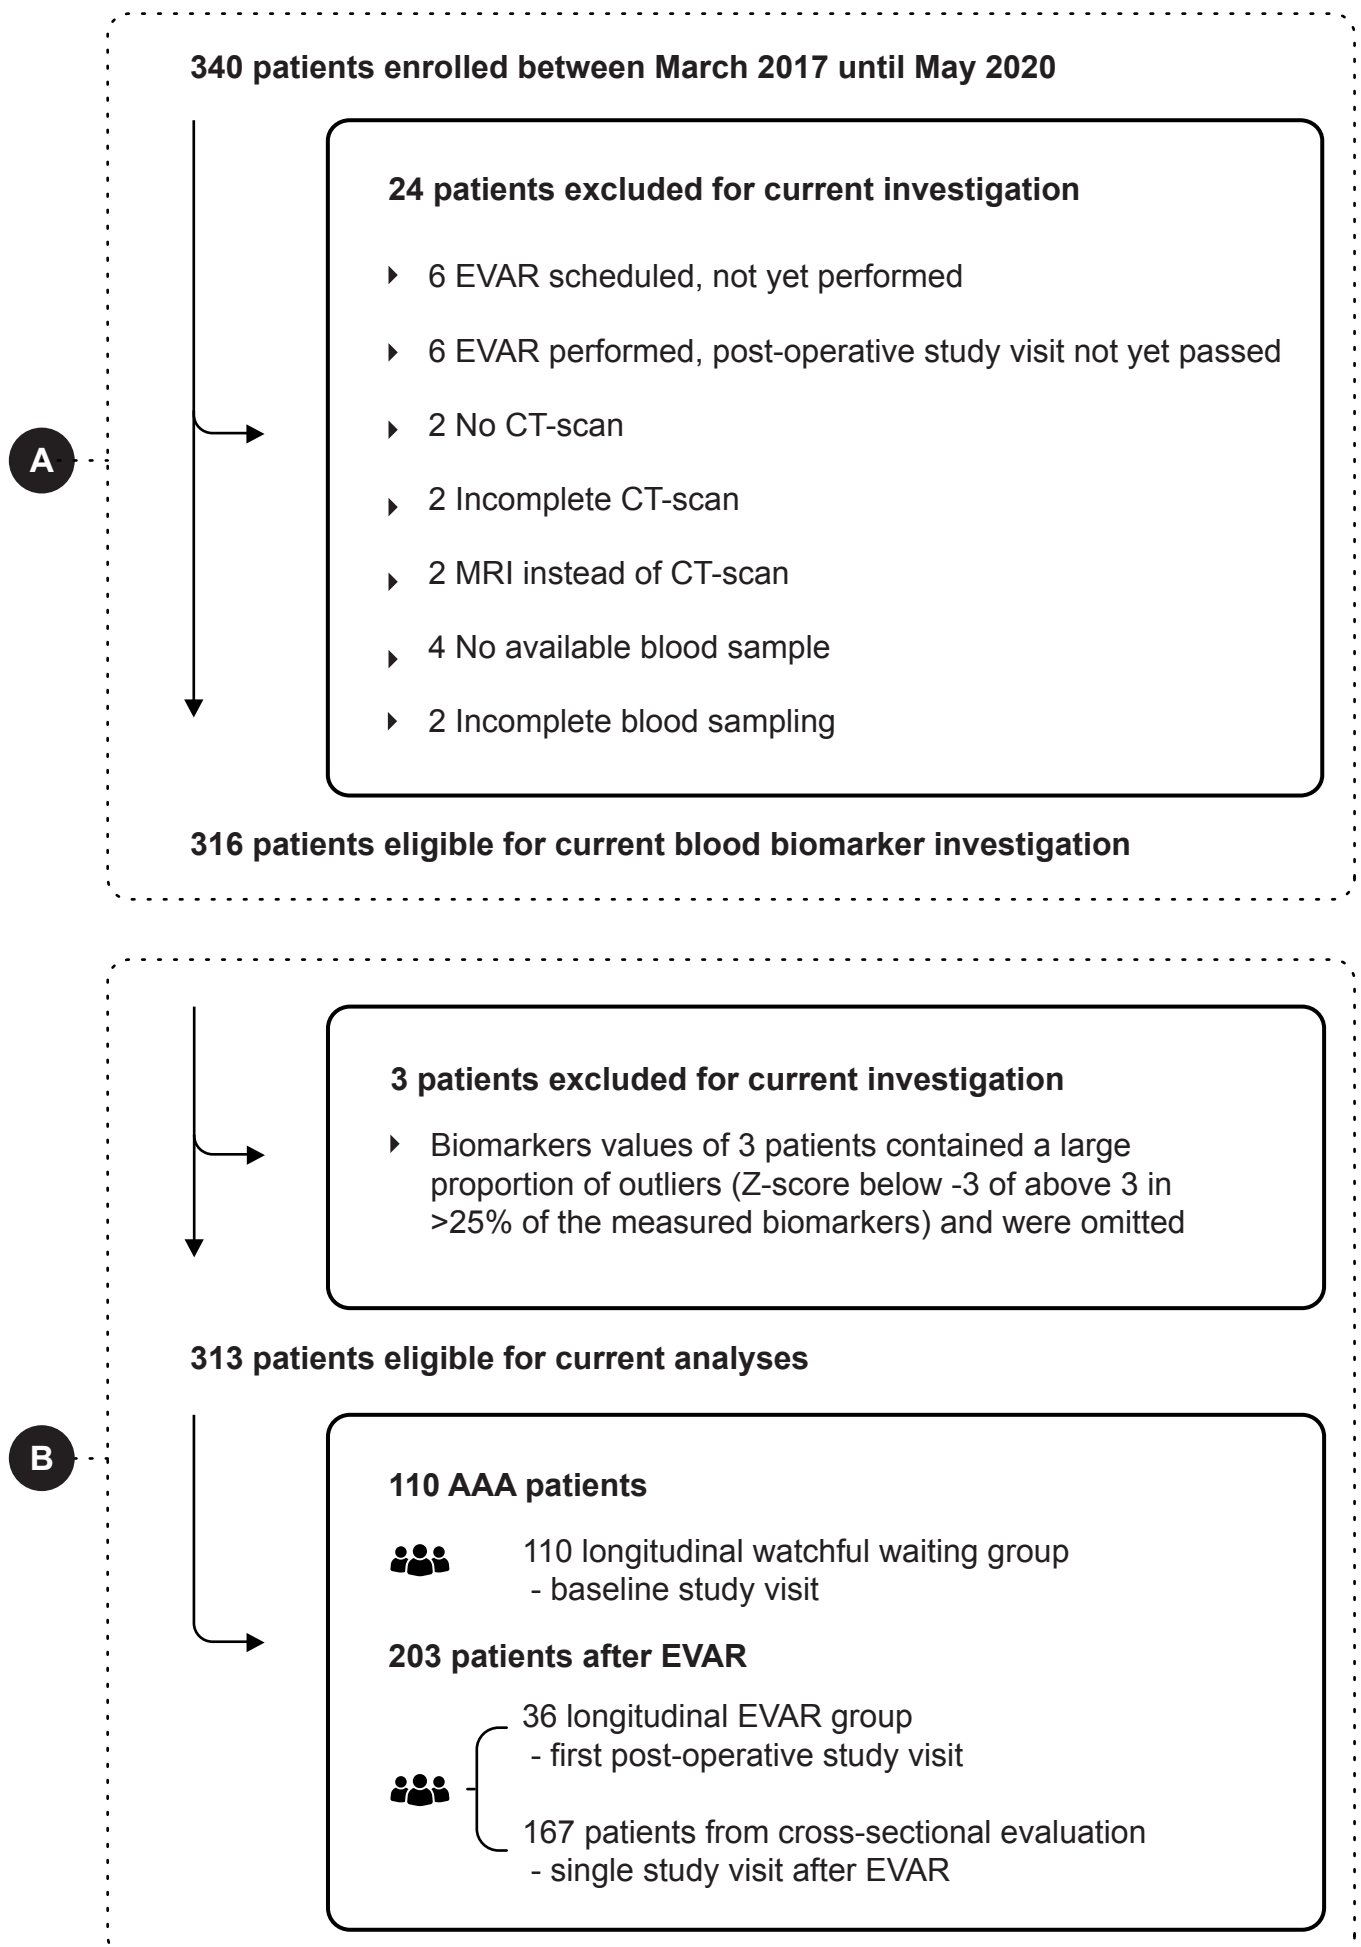

Supplemental Figure S2. Difference in biomarker levels between watchful waiting and post-EVAR patients

Post-EVAR patients vs. watchful waiting patients

Adjusted p-value

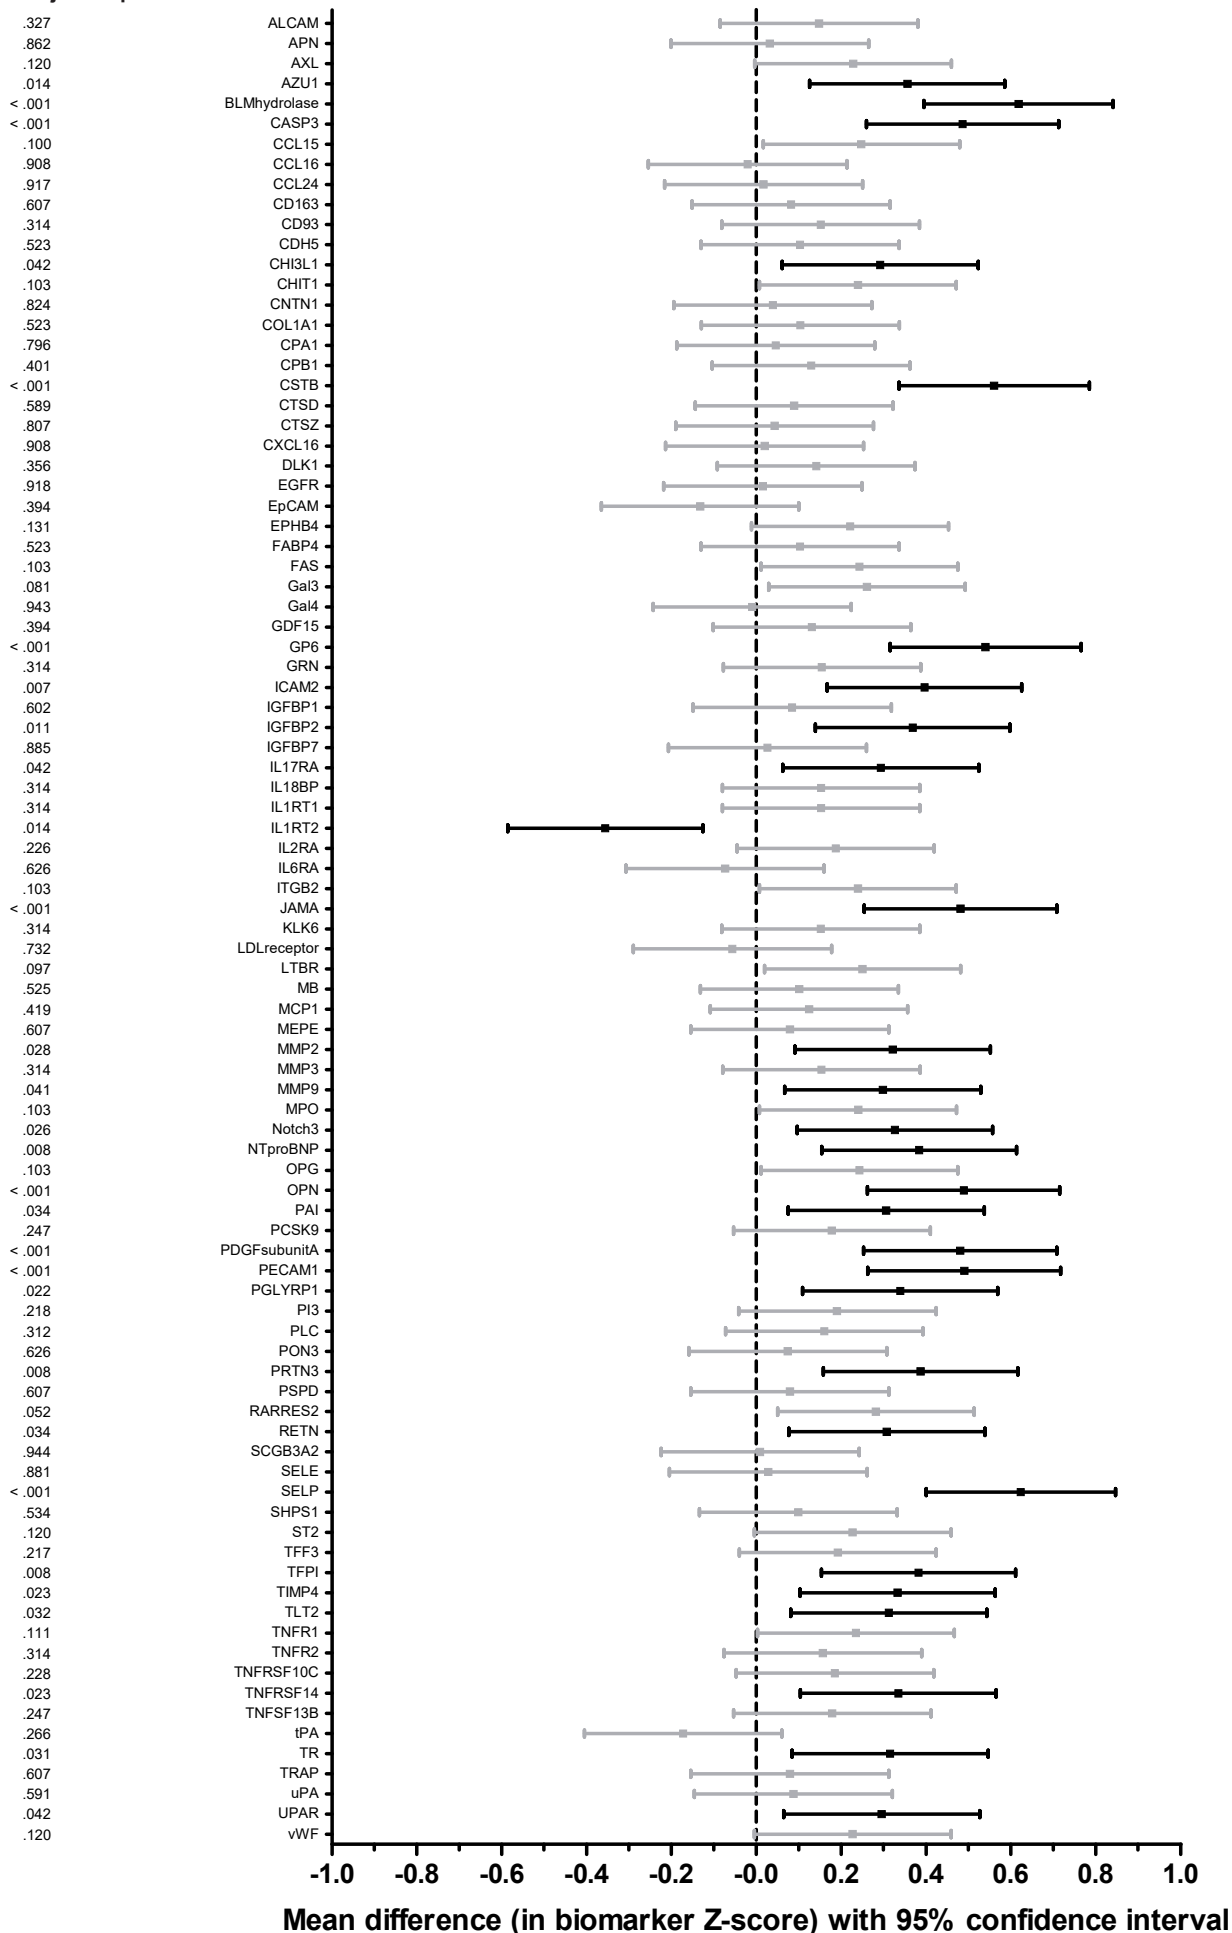

Adjusted p-value < .05 (corrected for multiple testing)

Non significant p-value

Supplementary figure S3. Distribution of Time Interval between EVAR and Current Measurements

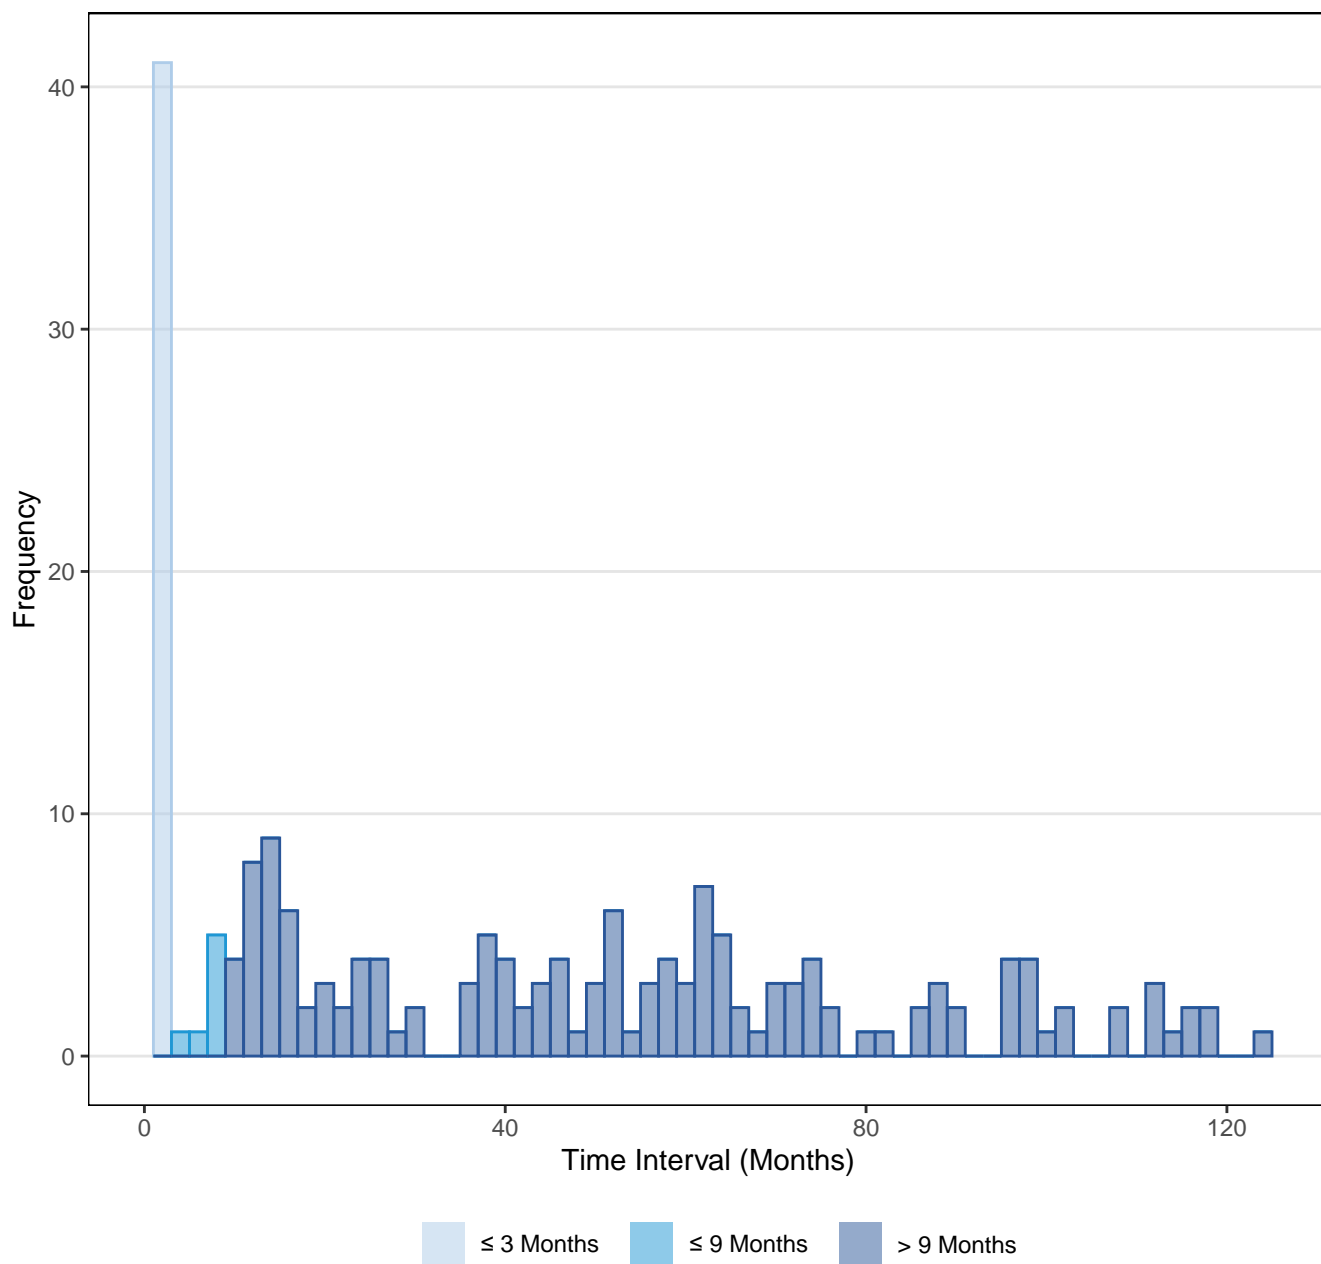

# Supplementary figure S4. Difference in biomarker levels according to time after EVAR procedure

Blood sampling <90 days after EVAR vs. blood sampling >90 days after EVAR

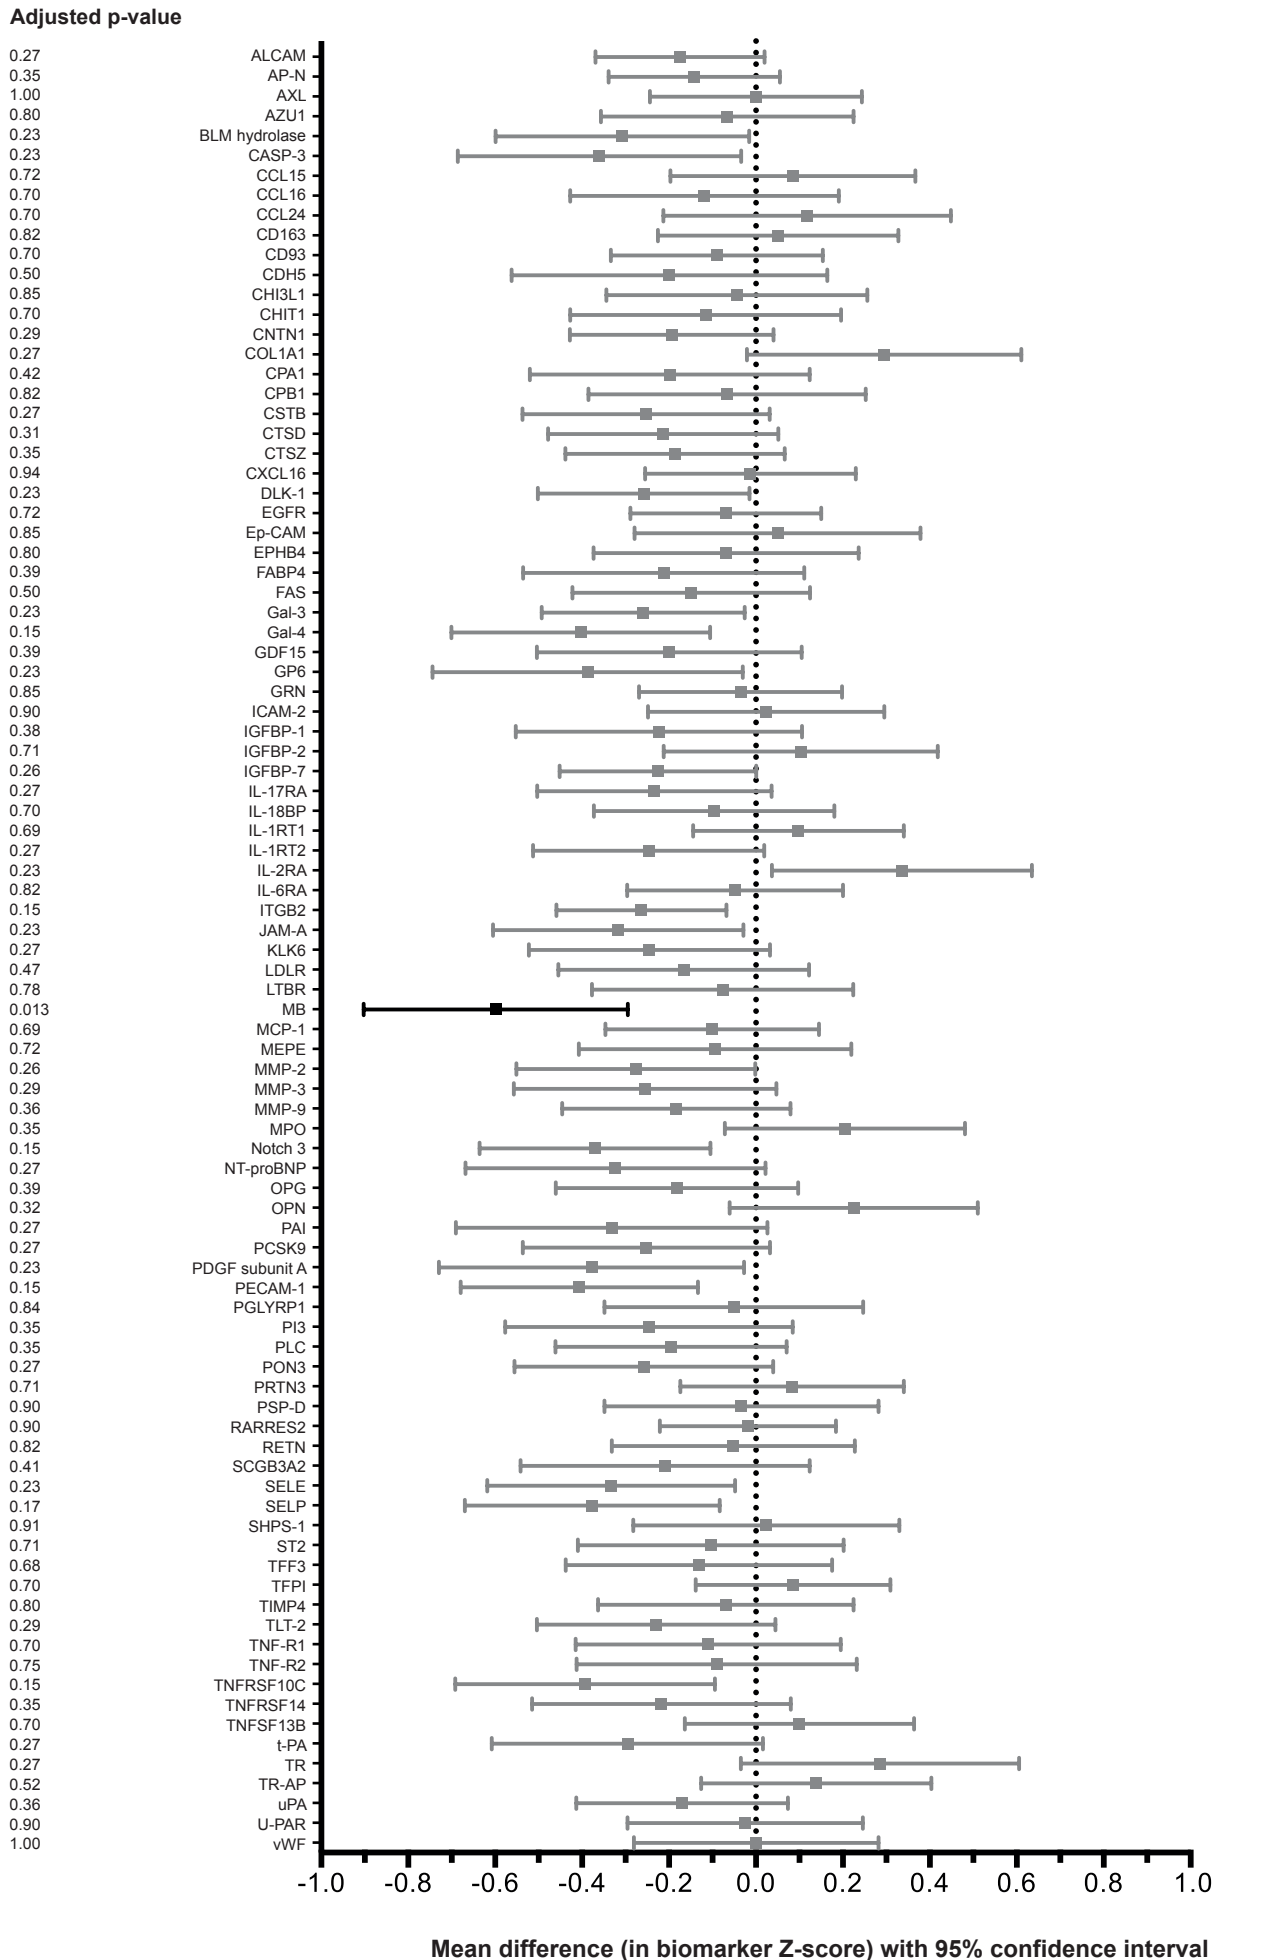

Supplemental Figure S5(A). Clustering in watchful waiting patients based on biomarker values

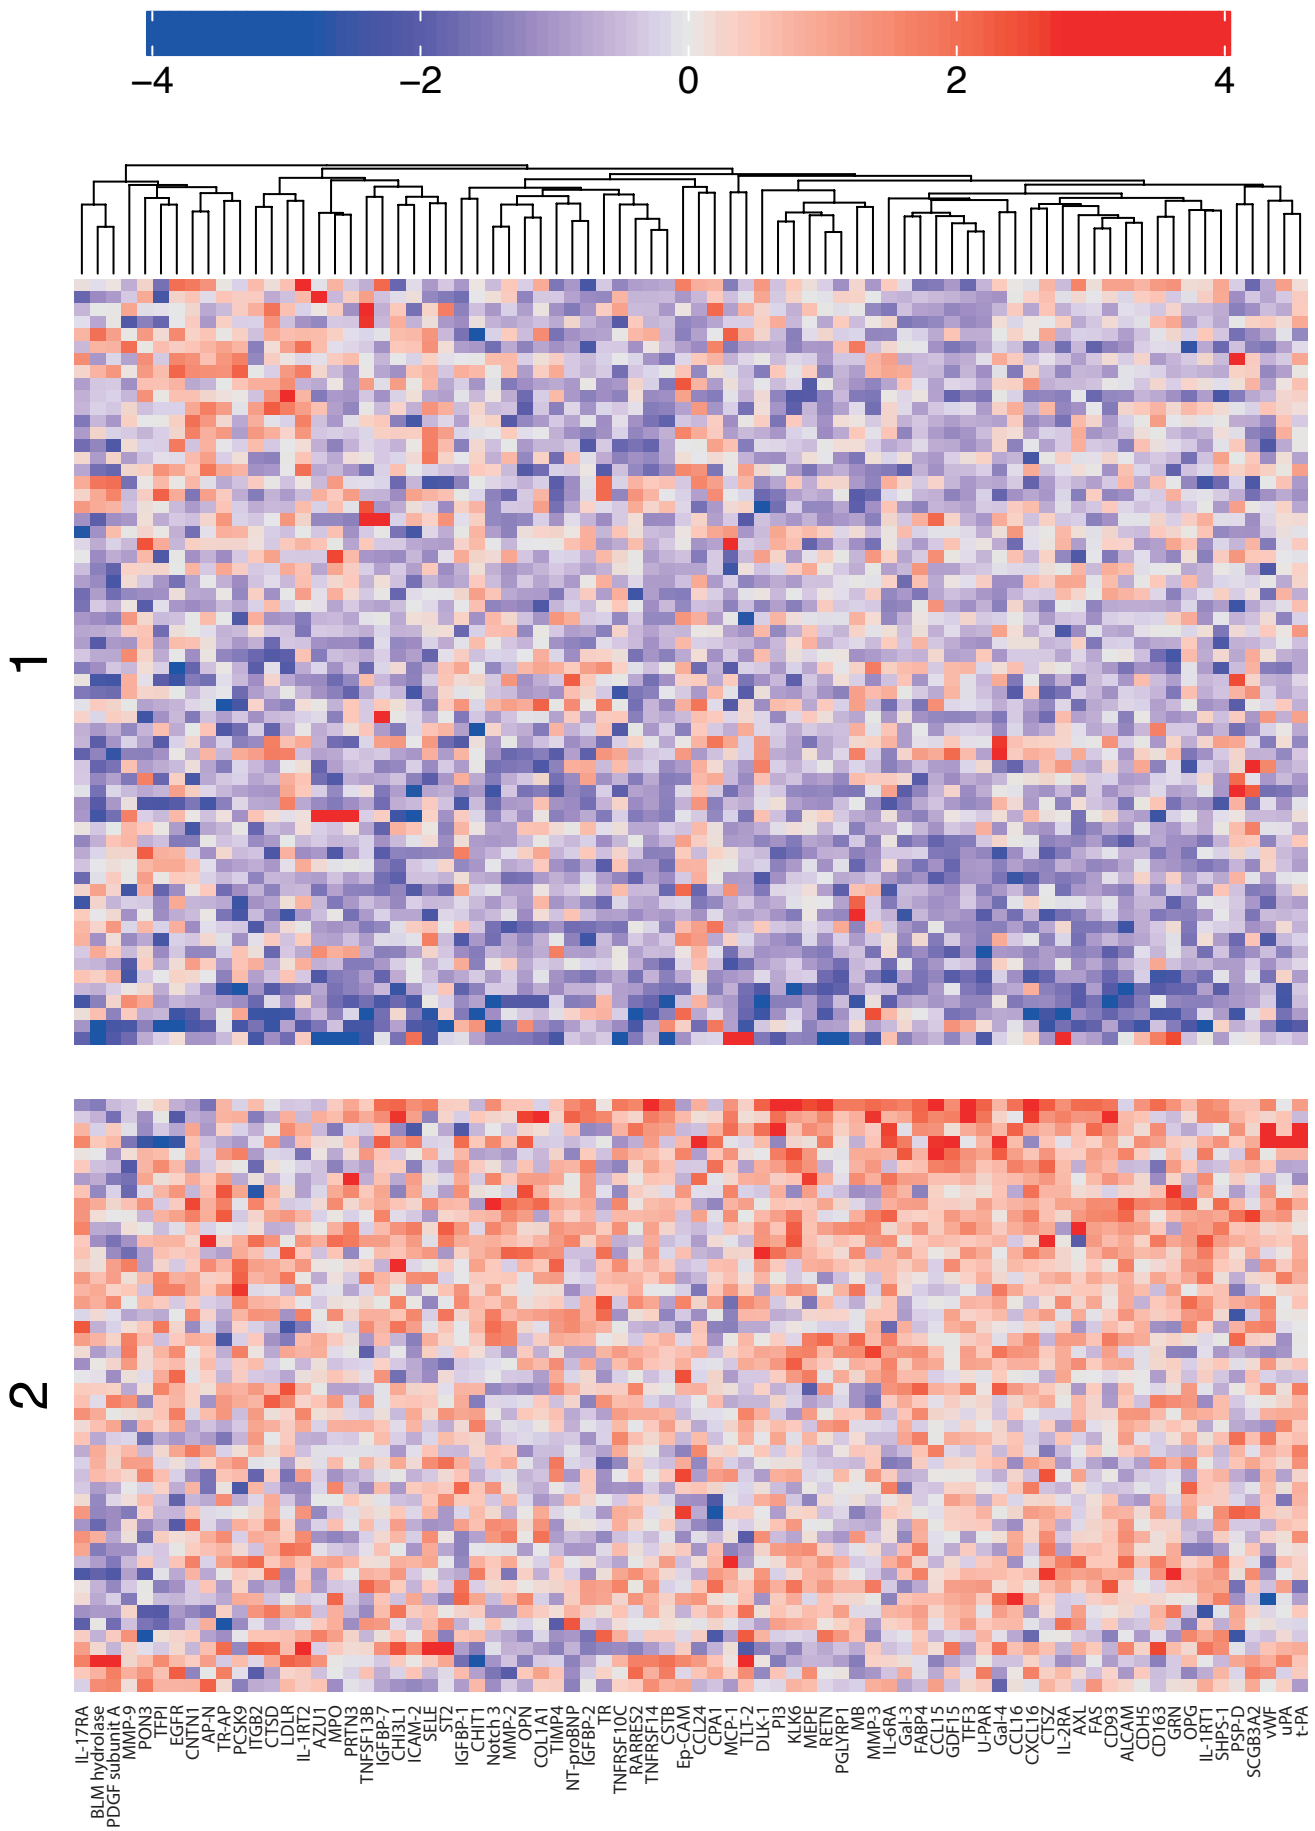

Supplemental Figure S5(B). Clustering in patients after EVAR, based on biomarker values

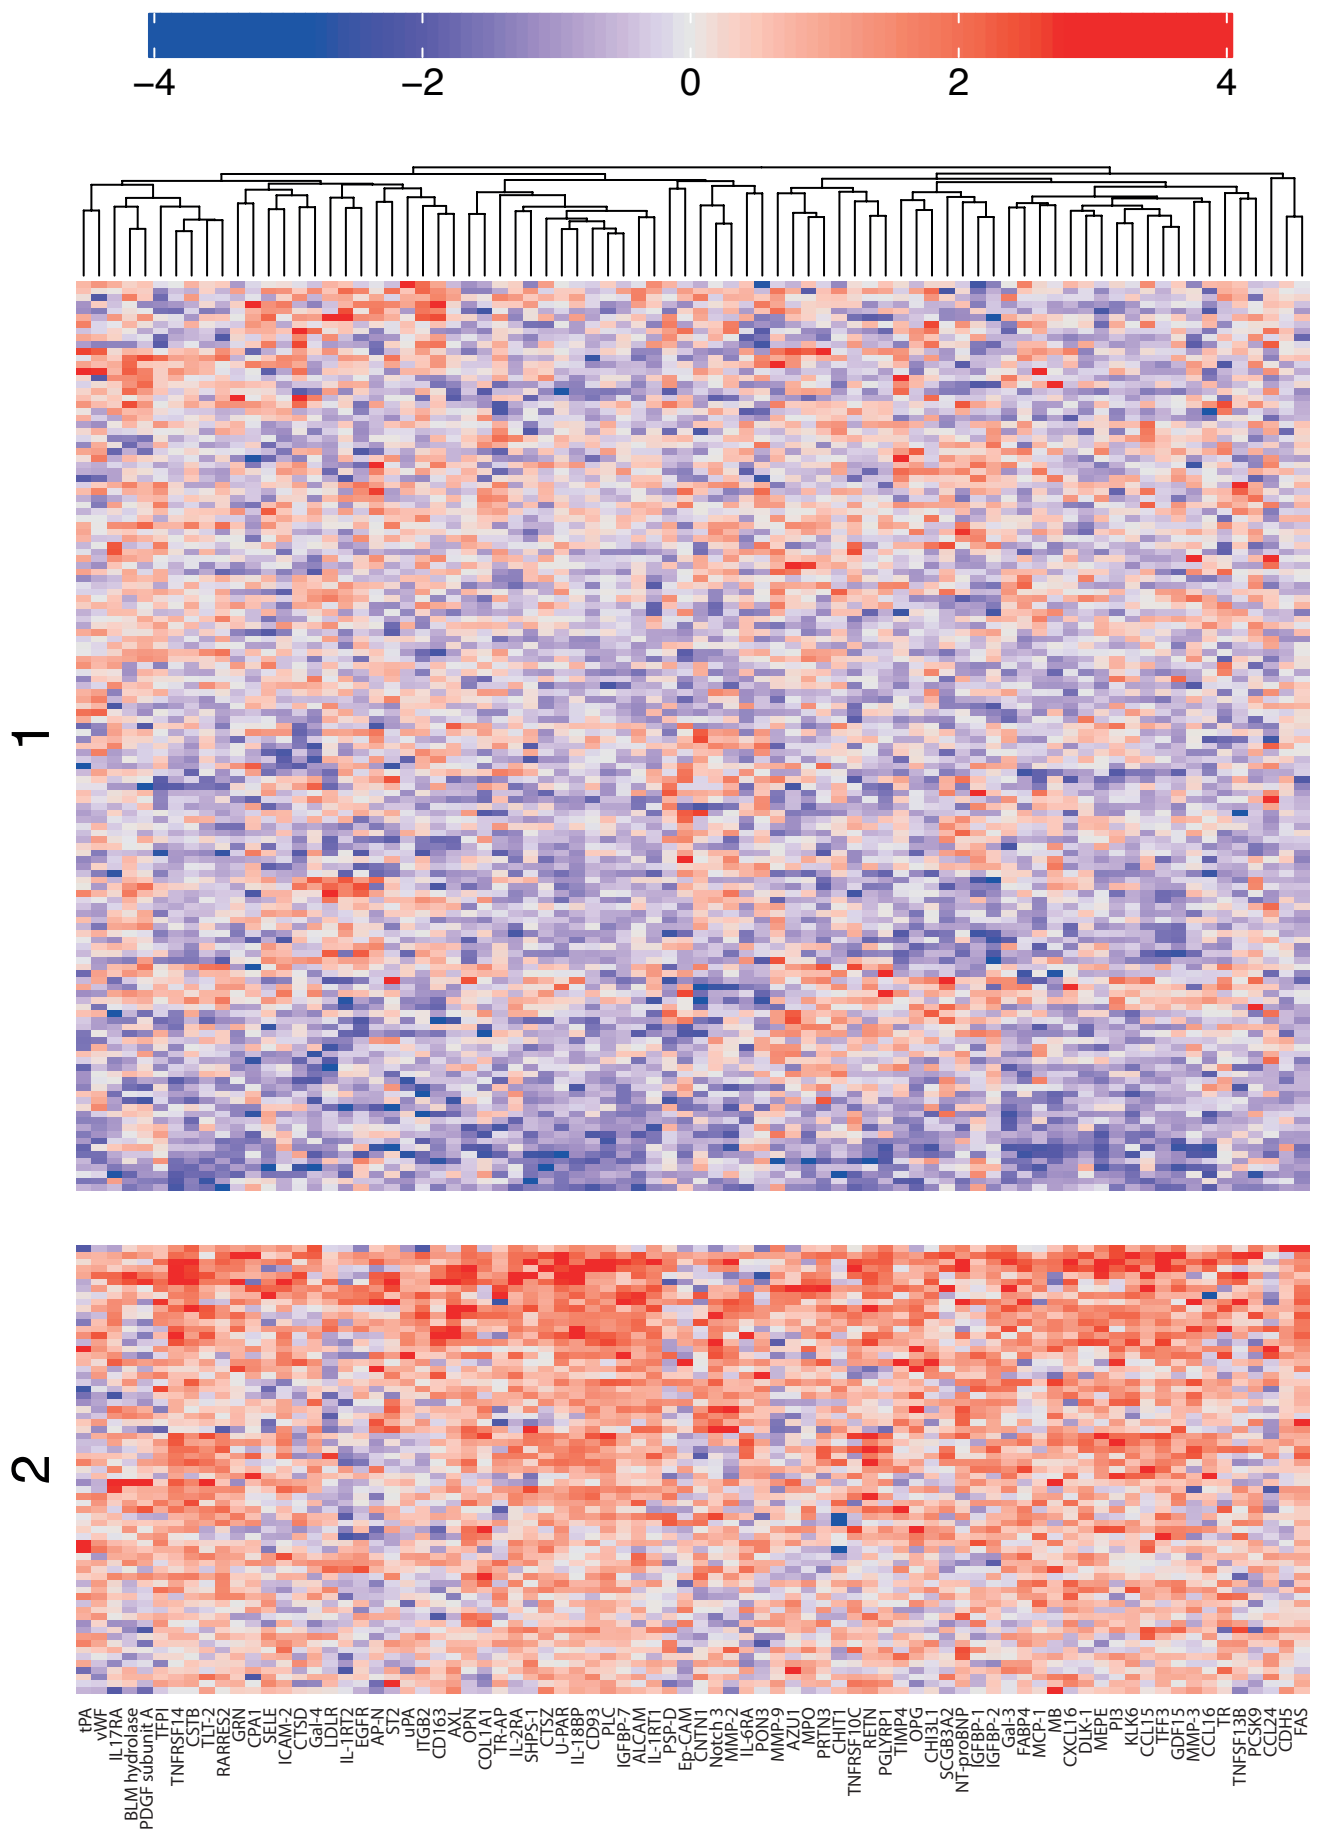

# Supplementary Figure S6. Association of biomarkers with sac growth in patients after EVAR

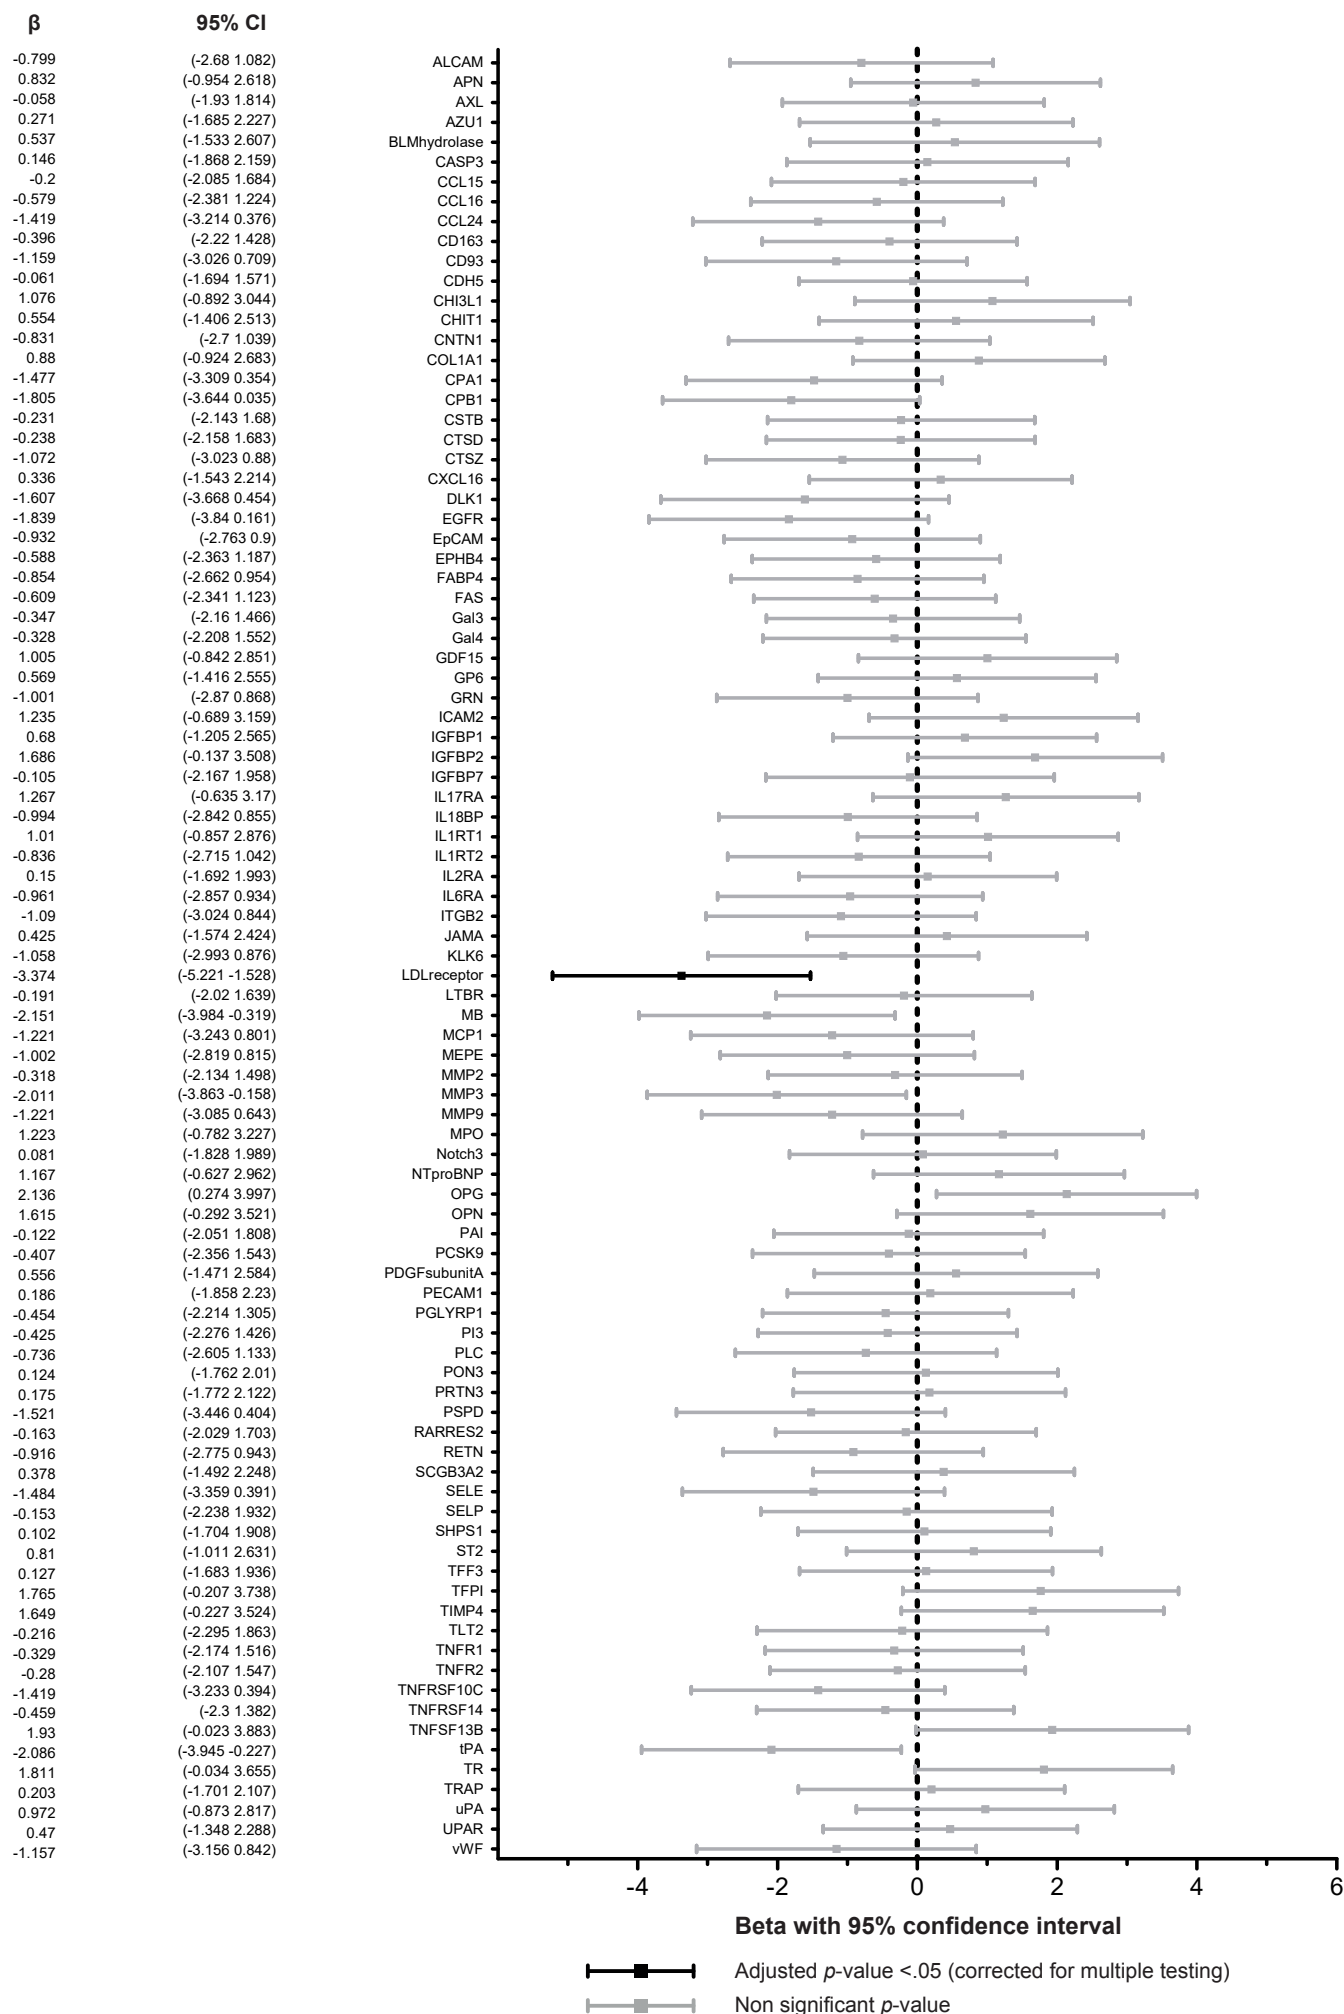

Supplement: sj-pdf-3-vmj-10.1177_1358863X231181159.pdf [file sj-pdf-3-vmj-10.1177_1358863X231181159.pdf]
